# Supplementary material for: The effects of soil phosphorus content on plant microbiota are driven by the plant phosphate starvation response
Source: PLoS Biol. 2019 Nov 13;17(11):e3000534. doi: 10.1371/journal.pbio.3000534 (PMC6876890; doi:10.1371/journal.pbio.3000534)
Supplement: S9 Table — (XLSX) [file pbio.3000534.s019.xlsx]

## Sheet: Table S9
S9 Table Alpha diversity data for the agar experiment.
Sample fraction	condition	Rep	Shannon	Richness
Inoculum	Inoculum	Rep1	3.62407	99
Inoculum	Inoculum	Rep1	3.62182	96
Inoculum	Inoculum	Rep1	3.5698	102
Inoculum	Inoculum	Rep2	3.56573	87
Inoculum	Inoculum	Rep2	3.5068	82
Inoculum	Inoculum	Rep2	3.51359	80
AgarNoPlant	0 micromolar Pi	Rep2	1.96273	66
AgarNoPlant	0 micromolar Pi	Rep2	2.46128	69
AgarNoPlant	0 micromolar Pi	Rep1	2.30966	58
AgarNoPlant	0 micromolar Pi	Rep1	2.33745	56
AgarNoPlant	0 micromolar Pi	Rep2	2.46587	78
AgarNoPlant	0 micromolar Pi	Rep2	2.56713	52
AgarNoPlant	0 micromolar Pi	Rep1	2.2232	56
AgarNoPlant	0 micromolar Pi	Rep1	2.72541	77
AgarNoPlant	0 micromolar Pi	Rep2	2.4955	64
AgarPlant	0 micromolar Pi	Rep1	2.41405	66
AgarPlant	0 micromolar Pi	Rep2	2.58213	63
AgarPlant	0 micromolar Pi	Rep1	2.22207	55
AgarPlant	0 micromolar Pi	Rep1	2.09806	53
AgarPlant	0 micromolar Pi	Rep2	2.58571	56
AgarPlant	0 micromolar Pi	Rep2	2.69202	61
Root	0 micromolar Pi	Rep1	2.59526	83
Root	0 micromolar Pi	Rep1	2.55641	73
Root	0 micromolar Pi	Rep1	2.47303	71
Root	0 micromolar Pi	Rep2	2.45902	64
Root	0 micromolar Pi	Rep2	2.7045	62
Shoot	0 micromolar Pi	Rep2	2.37147	78
Shoot	0 micromolar Pi	Rep1	2.85649	94
Shoot	0 micromolar Pi	Rep1	2.5934	79
Shoot	0 micromolar Pi	Rep2	2.38588	61
Shoot	0 micromolar Pi	Rep2	2.87865	86
Shoot	0 micromolar Pi	Rep1	2.81765	86
AgarNoPlant	10 micromolar Pi	Rep2	2.42102	83
AgarNoPlant	10 micromolar Pi	Rep2	2.42199	71
AgarNoPlant	10 micromolar Pi	Rep1	2.04406	55
AgarNoPlant	10 micromolar Pi	Rep2	2.35366	55
AgarNoPlant	10 micromolar Pi	Rep1	1.98928	58
AgarNoPlant	10 micromolar Pi	Rep1	2.22187	52
AgarNoPlant	10 micromolar Pi	Rep2	2.55037	76
AgarPlant	10 micromolar Pi	Rep1	2.36653	66
AgarPlant	10 micromolar Pi	Rep1	1.95759	57
AgarPlant	10 micromolar Pi	Rep2	2.57312	61
AgarPlant	10 micromolar Pi	Rep2	2.58383	61
AgarPlant	10 micromolar Pi	Rep1	2.33773	61
AgarPlant	10 micromolar Pi	Rep2	2.65567	68
Root	10 micromolar Pi	Rep1	2.78888	91
Root	10 micromolar Pi	Rep1	2.54817	77
Root	10 micromolar Pi	Rep1	2.62168	91
Root	10 micromolar Pi	Rep2	2.35229	71
Root	10 micromolar Pi	Rep2	2.42692	69
Root	10 micromolar Pi	Rep2	2.41966	70
Shoot	10 micromolar Pi	Rep2	2.55291	71
Shoot	10 micromolar Pi	Rep2	2.64747	93
Shoot	10 micromolar Pi	Rep1	2.74813	85
Shoot	10 micromolar Pi	Rep1	2.80342	68
Shoot	10 micromolar Pi	Rep2	2.46724	69
Shoot	10 micromolar Pi	Rep1	2.63279	59
AgarNoPlant	30 micromolar Pi	Rep2	2.45585	78
AgarNoPlant	30 micromolar Pi	Rep1	2.18401	72
AgarNoPlant	30 micromolar Pi	Rep2	2.40893	73
AgarNoPlant	30 micromolar Pi	Rep1	2.13996	67
AgarNoPlant	30 micromolar Pi	Rep1	1.93201	43
AgarNoPlant	30 micromolar Pi	Rep2	2.3265	56
AgarNoPlant	30 micromolar Pi	Rep2	2.50217	54
AgarPlant	30 micromolar Pi	Rep2	2.56523	75
AgarPlant	30 micromolar Pi	Rep2	2.59309	68
AgarPlant	30 micromolar Pi	Rep2	2.75248	82
AgarPlant	30 micromolar Pi	Rep1	2.13665	59
AgarPlant	30 micromolar Pi	Rep1	1.89559	46
AgarPlant	30 micromolar Pi	Rep1	2.30835	55
Root	30 micromolar Pi	Rep2	2.61635	76
Root	30 micromolar Pi	Rep1	2.49342	69
Root	30 micromolar Pi	Rep2	2.60965	74
Root	30 micromolar Pi	Rep1	2.57314	90
Root	30 micromolar Pi	Rep1	2.38747	70
Root	30 micromolar Pi	Rep2	2.52444	63
Shoot	30 micromolar Pi	Rep2	2.87878	78
Shoot	30 micromolar Pi	Rep1	2.81401	74
Shoot	30 micromolar Pi	Rep2	2.6704	72
Shoot	30 micromolar Pi	Rep1	2.9806	76
Shoot	30 micromolar Pi	Rep2	2.66388	67
Shoot	30 micromolar Pi	Rep1	2.7355	64
AgarNoPlant	50 micromolar Pi	Rep1	2.48383	64
AgarNoPlant	50 micromolar Pi	Rep2	2.55556	53
AgarNoPlant	50 micromolar Pi	Rep1	2.11146	49
AgarNoPlant	50 micromolar Pi	Rep2	2.07172	46
AgarNoPlant	50 micromolar Pi	Rep2	2.35347	47
AgarNoPlant	50 micromolar Pi	Rep1	2.02074	41
AgarNoPlant	50 micromolar Pi	Rep1	2.54396	89
AgarPlant	50 micromolar Pi	Rep2	2.63327	69
AgarPlant	50 micromolar Pi	Rep1	2.22616	64
AgarPlant	50 micromolar Pi	Rep2	2.68126	53
AgarPlant	50 micromolar Pi	Rep2	2.38525	49
AgarPlant	50 micromolar Pi	Rep1	1.92329	51
AgarPlant	50 micromolar Pi	Rep1	2.43504	58
Root	50 micromolar Pi	Rep2	2.68839	81
Root	50 micromolar Pi	Rep1	2.65845	76
Root	50 micromolar Pi	Rep1	2.6584	96
Root	50 micromolar Pi	Rep2	2.52423	81
Root	50 micromolar Pi	Rep2	2.83254	67
Root	50 micromolar Pi	Rep1	2.8882	77
Shoot	50 micromolar Pi	Rep1	2.95887	93
Shoot	50 micromolar Pi	Rep1	2.67934	69
Shoot	50 micromolar Pi	Rep2	2.98992	84
Shoot	50 micromolar Pi	Rep1	2.77047	63
Shoot	50 micromolar Pi	Rep2	2.8662	70
Shoot	50 micromolar Pi	Rep2	2.83676	71
AgarNoPlant	100 micromolar Pi	Rep2	2.5323	70
AgarNoPlant	100 micromolar Pi	Rep2	2.58088	68
AgarNoPlant	100 micromolar Pi	Rep2	2.61774	78
AgarNoPlant	100 micromolar Pi	Rep1	2.22361	52
AgarNoPlant	100 micromolar Pi	Rep1	2.32773	50
AgarNoPlant	100 micromolar Pi	Rep1	2.81406	69
AgarNoPlant	100 micromolar Pi	Rep1	2.48978	62
AgarPlant	100 micromolar Pi	Rep1	2.44236	66
AgarPlant	100 micromolar Pi	Rep2	2.80738	68
AgarPlant	100 micromolar Pi	Rep2	2.50099	50
AgarPlant	100 micromolar Pi	Rep2	2.70339	58
AgarPlant	100 micromolar Pi	Rep1	2.45377	58
AgarPlant	100 micromolar Pi	Rep1	2.61651	54
Root	100 micromolar Pi	Rep1	2.84197	75
Root	100 micromolar Pi	Rep2	2.74706	74
Root	100 micromolar Pi	Rep2	2.81103	74
Root	100 micromolar Pi	Rep1	2.74827	81
Root	100 micromolar Pi	Rep2	2.68155	64
Root	100 micromolar Pi	Rep1	2.97927	66
Shoot	100 micromolar Pi	Rep2	2.83836	81
Shoot	100 micromolar Pi	Rep1	2.92969	65
Shoot	100 micromolar Pi	Rep2	2.60771	60
Shoot	100 micromolar Pi	Rep2	2.74674	56
Shoot	100 micromolar Pi	Rep1	2.94784	83
Shoot	100 micromolar Pi	Rep1	2.77924	78
AgarNoPlant	1000 micromolar Pi	Rep1	2.25654	73
AgarNoPlant	1000 micromolar Pi	Rep2	2.09348	50
AgarNoPlant	1000 micromolar Pi	Rep2	2.13593	52
AgarNoPlant	1000 micromolar Pi	Rep1	2.20252	49
AgarNoPlant	1000 micromolar Pi	Rep2	2.33316	58
AgarNoPlant	1000 micromolar Pi	Rep1	2.91821	86
AgarNoPlant	1000 micromolar Pi	Rep1	2.46041	58
AgarNoPlant	1000 micromolar Pi	Rep1	2.38913	63
AgarPlant	1000 micromolar Pi	Rep1	2.34483	63
AgarPlant	1000 micromolar Pi	Rep2	2.46222	65
AgarPlant	1000 micromolar Pi	Rep1	2.14341	53
AgarPlant	1000 micromolar Pi	Rep2	2.46458	50
AgarPlant	1000 micromolar Pi	Rep2	2.57809	43
AgarPlant	1000 micromolar Pi	Rep1	2.41612	57
Root	1000 micromolar Pi	Rep1	2.83832	75
Root	1000 micromolar Pi	Rep2	2.80875	81
Root	1000 micromolar Pi	Rep1	2.89246	72
Root	1000 micromolar Pi	Rep1	2.83055	66
Root	1000 micromolar Pi	Rep2	2.70492	65
Shoot	1000 micromolar Pi	Rep2	2.82581	76
Shoot	1000 micromolar Pi	Rep2	2.91552	78
Shoot	1000 micromolar Pi	Rep1	2.76618	85
Shoot	1000 micromolar Pi	Rep1	2.69999	60
Shoot	1000 micromolar Pi	Rep2	2.73662	62
Shoot	1000 micromolar Pi	Rep2	2.74354	65
Shoot	1000 micromolar Pi	Rep1	2.71658	66
