# Supplementary material for: The effects of soil phosphorus content on plant microbiota are driven by the plant phosphate starvation response
Source: PLoS Biol. 2019 Nov 13;17(11):e3000534. doi: 10.1371/journal.pbio.3000534 (PMC6876890; doi:10.1371/journal.pbio.3000534)
Supplement: S12 Table — (XLSX) [file pbio.3000534.s022.xlsx]

## Sheet: Table S12
S12 Table List of known contaminant 16S sequences.
>contaminant1	Arabidopsis_thaliana_chloroplast_rRNA_AP000423.1	AAGGAAGCTATAAGTAATGCAACTATGAATCTCATGGAGAGTTCGATCCTGGCTCAGGATGAACGCTGGCGGCATGCTTAACACATGCAAGTCGGACGGGAAGTGGTGTTTCCAGTGGCGGACGGGTGAGTAACGCGTAAGAACCTGCCCTTGGGAGGGGAACAACAGCTGGAAACGGCTGCTAATACCCCGTAGGCTGAGGAGCAAAAGGAGGAATCCGCCCGAGGAGGGGCTCGCGTCTGATTAGCTAGTTGGTGAGGCAATAGCTTACCAAGGCGATGATCAGTAGCTGGTCCGAGAGGATGATCAGCCACACTGGGACTGAGACACGGCCCAGACTCCTACGGGAGGCAGCAGTGGGGAATTTTCCGCAATGGGCGAAAGCCTGACGGAGCAATG…
>contaminant23	Arabidopsis_thaliana_mitochondria_JF729201.1	GCCCGGTTCACGAGGTTCTACCACTGCAGGGCCCAATCATAGTCAAAAGAAGAGTTTGATCCTGGCTCAGAAGGAACGCTAGCTATATGCTTAACACATGCAAGTCGAACGTTGTTCTCGGGGAGCTAGGCAGAAGGAAAAGAGGCTCCTAGCTCAAGGTAGCTTGTCTCGCCCAGGAGGCGGGAAGAGTTGAGAACAAAGTGGCGAACGGGTGCGTAAGGCGTGGGAATCTGCCGAACAGTTCGGGCCAAATCCTGAAGAAAGCTAAAAAGCGCTGTTTGATGAGCCTGCGTAGTATTAGGTAGTTGGTTAGGTAAAGGCTGACCAAGCCAATGATGCTTAGCTGGTCTTTTCGGATGATCAGCCACACTGGGACTGAGACACGGCCCAGACTCCTAC…
>contaminant35	AT_18S	GTGCCAGCAGCCGCGGTAATTCCAGCTCCAATAGCGTATATTTAAGTTGTTGCAGTTAAAAAGCTCGTAGTTGAACCTTGGGATGGGTCGGCCGGTCCGCCTTTGGTGTGCATTGGTCGGCTTGTCCCTTCGGTCGGCGATACGCTCCTGGTCTTAATTGGCCGGGTCGTGCCTCCGGCGCTGTTACTTTGAAGAAATTAGAGTGCTCAAAGCAAGCCTACGCTCTGGATACATTAGCATGGGATAACATCATAGGATTTCGATCCTATTGTGTTGGCCTTCGGGATCGGAGTAATGATT
>contaminant38	Arabidopsis_thaliana_mitochondrion_JF29201.1_51636-53569	ATCATAGTCAAAAGAAGAGTTTGATCCTGGCTCAGAAGGAACGCTAGCTATATGCTTAACACATGCAAGTCGAACGTTGTTCTCGGGGAGCTAGGCAGAAGGAAAAGAGGCTCCTAGCTCAAGGTAGCTTGTCTCGCCCAGGAGGCGGGAAGAGTTGAGAACAAAGTGGCGAACGGGTGCGTAAGGCGTGGGAATCTGCCGAACAGTTCGGGCCAAATCCTGAAGAAAGCTAAAAAGCGCTGTTTGATGAGCCTGCGTAGTATTAGGTAGTTGGTTAGGTAAAGGCTGACCAAGCCAATGATGCTTAGCTGGTCTTTTCGGATGATCAGCCACACTGGGACTGAGACACGGCCCGGACTCCCACGGGGGGCAGCAGTGGGGAATCTTGGACAATGGGCG…
